# Supplementary material for: Multi-epitope-Based Vaccine Designed by Targeting Cytoadherence Proteins of Mycoplasma gallisepticum
Source: PubMed Central journal article supplement — ACS Omega. 2021 May 17;6(21):13742–55. doi: 10.1021/acsomega.1c01032 (PMC8173551; doi:10.1021/acsomega.1c01032), 2021-05-17
Supplement: ao1c01032_si_001.pdf [file ao1c01032_si_001.pdf]

**A multi-epitope-based vaccine designed by targeting cytoadherence proteins of *Mycoplasma gallisepticum***

Susithra Priyadarshni Mugunthan,<sup>a</sup>

Mani Chandra Harish,<sup>a\*</sup>

<sup>a</sup> Plant Genetic Engineering and Molecular Farming Lab,

Department of Biotechnology, Thiruvalluvar University, Serkkadu, Vellore- 632115, Tamil Nadu, India.

**\*Corresponding Author:**

Assistant Professor, Department of Biotechnology, Thiruvalluvar University, Serkkadu, Vellore- 632115, Tamil Nadu, India.

Mobile: 09842726952

E-mail ID: mc.harish.tvu.edu.in

**Supplementary Table 1:** List of predicted MHC I binding epitopes

| S.No       | Protein   | Allele     | Peptide   | 1-log50k(aff)* | Affinity(nM)# | %Rank |        |      |
|------------|-----------|------------|-----------|----------------|---------------|-------|--------|------|
| 1.         | GapA      | HLA-B40:06 | QEFTGFDAL | 0.417          | 549.34        | 0.50  |        |      |
|            |           |            | FEKEITAAV | 0.488          | 253.54        | 0.20  |        |      |
|            |           |            | KEITAAVNV | 0.493          | 242.26        | 0.17  |        |      |
|            |           |            | FENKINDIV | 0.439          | 431.64        | 0.40  |        |      |
|            |           |            | GEYVAVPQA | 0.581          | 93.27         | 0.05  |        |      |
|            |           | HLA-B41:04 | QEFTGFDAL | 0.582          | 92.19         | 0.17  |        |      |
|            |           |            | LETQTTPL  | 0.530          | 162.13        | 0.40  |        |      |
|            |           |            | VESLFTTAL | 0.566          | 109.23        | 0.25  |        |      |
|            |           |            | KEITAAVNV | 0.516          | 187.13        | 0.50  |        |      |
|            |           |            | GEYVAVPQA | 0.518          | 184.30        | 0.40  |        |      |
|            |           | HLA-B41:03 | QEFTGFDAL | 0.666          | 37.11         | 0.12  |        |      |
|            |           |            | LETQTTPL  | 0.672          | 34.77         | 0.10  |        |      |
|            |           |            | VESLFTTAL | 0.682          | 31.21         | 0.07  |        |      |
|            |           |            | FEKEITAAV | 0.621          | 60.71         | 0.30  |        |      |
|            |           | 2.         | PlpA      | HLA-B40:06     | YEYPEYEEI     | 0.427 | 492.48 | 0.40 |
|            |           |            |           |                | LENQYPPA      | 0.516 | 188.31 | 0.50 |
| HLA-B41:03 | YEYPEYEEI |            |           | 0.601          | 74.57         | 0.50  |        |      |
|            | IESQLQALL |            |           | 0.649          | 44.84         | 0.17  |        |      |
|            | FEKLMLANM |            |           | 0.610          | 68.01         | 0.40  |        |      |
| HLA-B41:04 | IESQLQALL |            |           | 0.503          | 216.28        | 0.50  |        |      |
|            | FEKLMLANM |            |           | 0.513          | 193.54        | 0.50  |        |      |

|            |           |            |           |            |            |           |        |       |
|------------|-----------|------------|-----------|------------|------------|-----------|--------|-------|
|            |           |            | LENQYYPPA | 0.516      | 187.77     | 0.50      |        |       |
| 3.         | Hlp3      | HLA-B40:06 | AEVQPEPVV | 0.435      | 451.94     | 0.40      |        |       |
|            |           |            | QEYDYPPA  | 0.583      | 91.54      | 0.50      |        |       |
|            |           |            | RQLGMIEPV | 0.413      | 572.43     | 0.50      |        |       |
|            |           |            | AEFRSRTLA | 0.490      | 250.27     | 0.20      |        |       |
|            |           | HLA-B41:03 | QELLYNVI  | 0.602      | 74.16      | 0.50      |        |       |
|            |           |            | AEQVEQQPV | 0.625      | 57.82      | 0.30      |        |       |
|            |           |            | QETKHHHAL | 0.663      | 38.54      | 0.12      |        |       |
|            |           | HLA-B41:04 | QELLYNVI  | 0.588      | 86.16      | 0.17      |        |       |
|            |           |            | AEQVEQQPV | 0.545      | 137.63     | 0.30      |        |       |
|            |           |            | QETKHHHAL | 0.560      | 117.14     | 0.25      |        |       |
|            |           |            | QEYDYPPA  | 0.538      | 147.88     | 0.40      |        |       |
|            |           |            | AEFRSRTLA | 0.514      | 192.48     | 0.50      |        |       |
|            |           | 4.         | CrmA      | HLA-B40:06 | NEIGVILPL  | 0.518     | 184.51 | 0.12  |
|            |           |            |           |            | HLA-B41:03 | NEIGVILPL | 0.693  | 27.86 |
|            | GEIVNDFIL |            |           | 0.621      | 60.60      | 0.30      |        |       |
| HLA-B41:04 | NEIGVILPL |            |           | 0.594      | 80.45      | 0.15      |        |       |
|            | RQTRAYYAL |            |           | 0.591      | 83.36      | 0.17      |        |       |

**Supplementary Table 2:** List of MHCII binding epitopes

| S.No | Protein | Allele | Peptide       | Core peptide | 1-log <sub>50k</sub> (affinity)* | Binding Affinity(nM)# | %Rank |
|------|---------|--------|---------------|--------------|----------------------------------|-----------------------|-------|
| 1.   | GapA    | DRB1_1 | IRLRLVIDRSRAT | LLVIDRSRA    | 0.660                            | 39.48                 | 0.09  |

|    |      |               |                     |           |       |        |      |
|----|------|---------------|---------------------|-----------|-------|--------|------|
|    |      | 482           | N                   |           |       |        |      |
|    |      | DRB1_1<br>445 | IRLRLVIDRSRAT<br>N  | LLVIDRSRA | 0.560 | 117.07 | 0.12 |
|    |      |               | NPRNILNALTTAK<br>GF | LNALTTAKG | 0.464 | 328.57 | 2.00 |
|    |      |               | PFEKEITAAVNVR<br>SL | ITAAVNRS  | 0.462 | 336.19 | 2.00 |
|    |      | DRB1_1<br>366 | IRLRLVIDRSRAT<br>N  | LLVIDRSRA | 0.780 | 10.84  | 0.40 |
|    |      | DRB1_1<br>310 | IRLRLVIDRSRAT<br>N  | LLVIDRSRA | 0.731 | 18.29  | 0.70 |
| 2. | PlpA | DRB1_1<br>445 | KTFSLNKGLNKVII<br>R | LNKGLNKVI | 0.467 | 320.42 | 1.80 |
|    |      | DRB1_1<br>310 | KTFSLNKGLNKVII<br>R | LNKGLNKVI | 0.700 | 25.58  | 1.60 |
| 3. | Hlp3 | DRB1_1<br>482 | KIHNKILKNLAKL<br>KK | ILKNLAKLK | 0.601 | 75.28  | 0.60 |
|    |      |               | NQTFNLIKPVFKFL<br>K | FNLIKPVFK | 0.556 | 121.44 | 1.80 |
|    |      |               | RPTYGLRRVSRIPS<br>L | LRRVSRIPS | 0.556 | 121.99 | 1.80 |
|    |      | DRB1_1<br>445 | KIHNKILKNLAKL<br>KK | ILKNLAKLK | 0.523 | 173.55 | 0.40 |
|    |      |               | RPTYGLRRVSRIPS<br>L | LRRVSRIPS | 0.470 | 309.43 | 1.70 |
|    |      | DRB1_1<br>366 | KIHNKILKNLAKL<br>KK | ILKNLAKLK | 0.782 | 10.61  | 0.40 |
|    |      |               | QTFNLIKPVFKFLK<br>K | FNLIKPVFK | 0.731 | 18.28  | 1.90 |

|    |      |               |                     |           |       |        |      |
|----|------|---------------|---------------------|-----------|-------|--------|------|
|    |      |               | YGLRRVSRIPSLAP<br>R | LRRVSRIPS | 0.732 | 18.15  | 1.90 |
|    |      | DRB1_1<br>310 | KIHNKILKNLAKL<br>KK | ILKNLAKLK | 0.728 | 19.06  | 0.80 |
|    |      |               |                     |           |       |        |      |
| 4. | CrmA | DRB1_1<br>445 | FSRLYLNSVNSLSF<br>I | LYLNSVNSL | 0.477 | 286.75 | 1.40 |
|    |      |               | ATTYLRSQIGLAR<br>TS | LRSQIGLAR | 0.468 | 317.79 | 1.80 |
|    |      |               | PGDQFSSIKNIRTIF     | FSSIKNIRT | 0.471 | 305.49 | 1.70 |
|    |      |               | SVYKKIITQTANV<br>KK | IITQTANVK | 0.464 | 328.38 | 2.00 |
|    |      | DRB1_1<br>366 | FSRLYLNSVNSLSF<br>I | LYLNSVNSL | 0.743 | 16.09  | 1.40 |
|    |      |               | PGDQFSSIKNIRTIF     | FSSIKNIRT | 0.744 | 16.00  | 1.40 |
|    |      | DRB1_1<br>310 | FSRLYLNSVNSLSF<br>I | LYLNSVNSL | 0.730 | 18.57  | 0.70 |
|    |      |               | EIVNDFILDAPILP<br>K | FILDAPILP | 0.631 | 54.22  | 1.80 |
|    |      |               | LGFDGIRNNLNVG<br>VK | IRNNLNVGV | 0.654 | 42.06  | 1.10 |

**Supplementary Table 3:** Models from Galaxy refine server

| Model   | GDT-HA | RMSD  | MolProbity | Clash score | Poor rotomers | Rama favored |
|---------|--------|-------|------------|-------------|---------------|--------------|
| MODEL 1 | 0.7832 | 0.820 | 4.049      | 126.8       | 5.7           | 60.8         |
| MODEL 2 | 0.7883 | 0.821 | 4.052      | 117.5       | 6.3           | 60.8         |
| MODEL 3 | 0.7793 | 0.838 | 4.100      | 122.3       | 7.0           | 60.8         |
| MODEL 4 | 0.7908 | 0.828 | 4.127      | 117.2       | 8.2           | 62.4         |
| MODEL 5 | 0.7806 | 0.822 | 3.998      | 124.3       | 5.1           | 61.3         |

**Supplementary Table 4:** The binding energy and attractive VDW scores for suggested epitopes with chicken BF2 alleles using PatchDock

| S.No | Protein | Ligand    | Receptor    | Global Energy<br>kcal/mol | Attractive VDW<br>kcal/mol |
|------|---------|-----------|-------------|---------------------------|----------------------------|
| 1.   | GapA    | QEFTGFDAL | BF2<br>2101 | -44.69                    | -20.36                     |
|      |         |           | BF2<br>0401 | -6.25                     | -4.75                      |
| 2.   | PlpA    | YEYPEYEEI | BF2<br>2101 | -58.07                    | -27.10                     |
|      |         |           | BF2<br>0401 | -46.58                    | -22.33                     |
| 3.   | Hlp3    | QELLRYNVI | BF2<br>2101 | -44.73                    | -26.81                     |
|      |         |           | BF2<br>0401 | -44.05                    | -29.36                     |

|    |      |           |      |        |        |
|----|------|-----------|------|--------|--------|
| 4. | CrmA | NEIGVILPL | BF2  | -69.39 | -27.93 |
|    |      |           | 2101 |        |        |
|    |      |           | BF2  | -48.16 | -29.74 |
|    |      |           | 0401 |        |        |

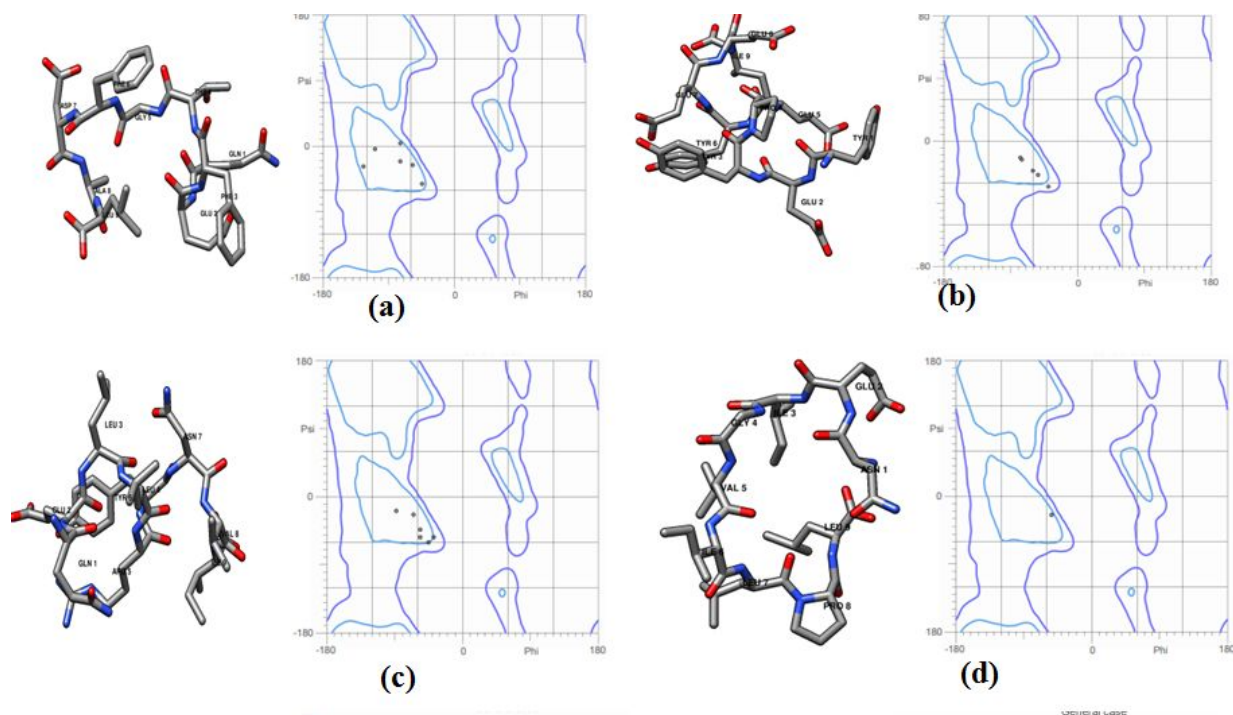

**Supplementary Figure 1:** Model and structure validation of epitopes (a) GapA (QEFTGFDAL), (b) PlpA (YEYPEYEEI), (c) Hlp3 (QELLRYNVI), (d) CrmA (NEIGVILPL).

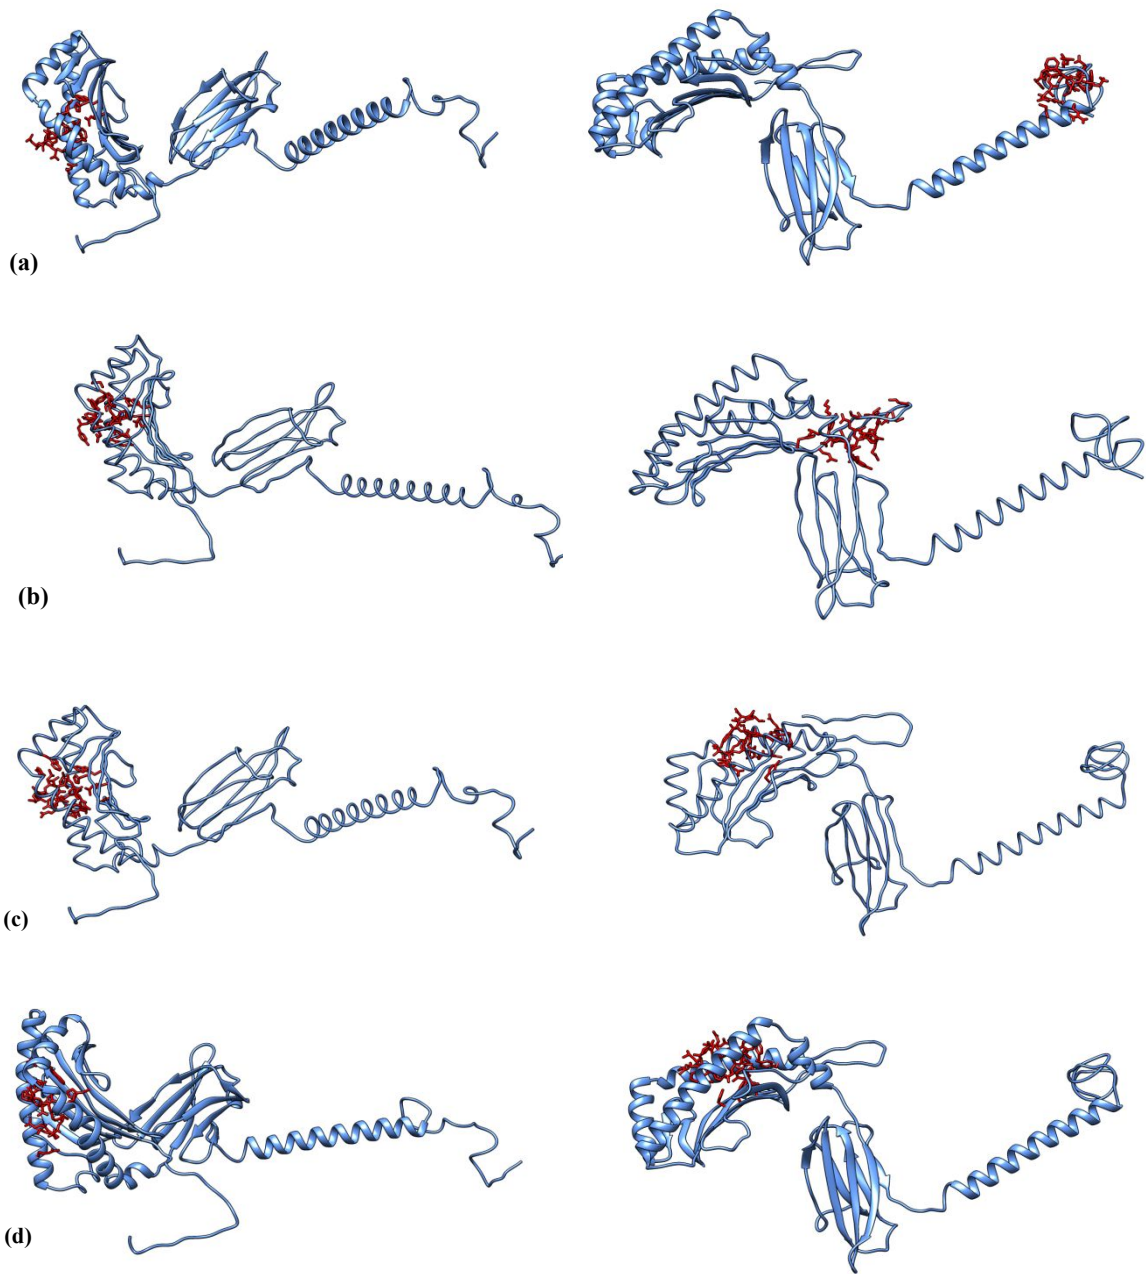

**Supplementary Figure 2:** Docked complex of predicted epitopes with BF2 2101 and BF2 0401 alleles respectively. (a) GapA, (b) PlpA, (c) Hlp3, (d) CrmA
